# Supplementary material for: Extracellular vesicle α-synuclein seeds drive divergent phenoconversion from iRBD to Parkinsonism
Source: Research Square preprint supplement (doi:10.21203/rs.3.rs-8466772/v1), 2026-01-09
Supplement: Supplementary file 1 [file 6821f5e9967a2f42f1af912d.xlsx]

## Sheet: Sheet1
Supplementary Table 1. The clinical parameters of each patient with Parkinson's disease, each patient with multiple system atrophy and each healthy control.
Sample ID	Diagnose	Sex	Age, years	Age at onset, years	Disease duration, years	MDS-UPDRS-III scores	UMSARS-II scores
PD1	PD	M	58	46	12	72	/
PD2	PD	M	73	66	7	41	/
PD3	PD	M	70	64	6	66	/
PD4	PD	M	74	71	3	40	/
PD5	PD	F	63	55	8	39	/
PD6	PD	F	64	58	6	41	/
PD7	PD	M	64	59	5	46	/
PD8	PD	M	73	63	10	41	/
PD9	PD	M	71	69	2	41	/
PD10	PD	F	59	56	3	40	/
PD11	PD	F	56	50	6	39	/
PD12	PD	F	64	62	2	18	/
PD13	PD	M	64	60	4	29	/
PD14	PD	M	77	62	15	56	/
MSA1	MSA-C	M	54	51	3	27	9
MSA2	MSA-C	F	52	51	1	21	8
MSA3	MSA-P	F	52	48	4	44	14
MSA4	MSA-P	M	74	72	2	44	18
MSA5	MSA-P	M	55	52	3	65	Missing
MSA6	MSA-P	M	66	63	3	44	Missing
MSA7	MSA-P	M	65	61	4	77	30
MSA8	MSA-C	M	77	74	3	52	21
MSA9	MSA-P	F	66	63	3	40	Missing
MSA10	MSA-P	F	59	56	3	58	38
MSA11	MSA P	M	74	72	2	19	9
MSA12	MSA-C	F	59	58	1	31	13
MSA13	MSA-C	M	63	57	6	43	25
MSA14	MSA-P	F	63	57	6	37	23
HC1	HC	M	70	/	/	/	/
HC2	HC	F	67	/	/	/	/
HC3	HC	F	74	/	/	/	/
HC4	HC	M	70	/	/	/	/
HC5	HC	M	55	/	/	/	/
HC6	HC	F	53	/	/	/	/
HC7	HC	M	71	/	/	/	/
HC8	HC	M	52	/	/	/	/
HC9	HC	M	65	/	/	/	/
HC10	HC	F	69	/	/	/	/
HC11	HC	F	67	/	/	/	/
HC12	HC	M	56	/	/	/	/
HC13	HC	F	57	/	/	/	/
