# Supplementary material for: Extracellular vesicle α-synuclein seeds drive divergent phenoconversion from iRBD to Parkinsonism
Source: Research Square preprint supplement (doi:10.21203/rs.3.rs-8466772/v1), 2026-01-09
Supplement: Supplementary file 2 [file Source Data file.xlsx]

## Sheet: Fig.1
	Fig.1g
	1 m.p.i.			5 m.p.i.
	Neuα-syn	Oligα-syn	Ctrl	Neuα-syn	Oligα-syn	Ctrl
	1.06	1.10286	1.02484	1.40606	1.19518	1.01226
	1.04711	1.06755	1.06571	1.13946	1.24527	1.02983
	1.09516	1.11101	0.951081	1.1422	1.3069	1.07807
	1.06395	1.01169		1.37768	1.20918	0.915877
	Fig.1h
	1 m.p.i.			5 m.p.i.
	Neuα-syn	Oligα-syn	Ctrl	Neuα-syn	Oligα-syn	Ctrl
	63.8889	56.9014	51.978	73.5366	64.2	54.6552
	51.3636	45.5607	53.0769	67.5	50.0581	67.337
	46.3559	40.8547	78.4459	72.0968	51.875	61.85
	59.6988	30.2817		65.7895	41.5234	36.0769
	Fig.1i
	1 m.p.i.			5 m.p.i.
	Neuα-syn	Oligα-syn	Ctrl	Neuα-syn	Oligα-syn	Ctrl
	18	71	106	41	75	87
	22	107	92	20	86	92
	59	117	90	31	80	100
	83	142		38	128	79
	Fig.1j
	1 m.p.i.			5 m.p.i.
	Neuα-syn	Oligα-syn	Ctrl	Neuα-syn	Oligα-syn	Ctrl
	1.33	4.68	5.47	3.49	5.57	5.5
	1.31	5.64	5.59	1.56	4.98	7.17
	3.17	5.53	6.28	2.59	4.8	7.16
	5.73	4.98		2.89	6.15	6.13
	Fig.1l
	1 m.p.i.			5 m.p.i.
	Neuα-syn	Oligα-syn	Ctrl	Neuα-syn	Oligα-syn	Ctrl
	1224	1236	1248	672	936	1272
	1092	1128	1344	612	1032	1188
	1152	1332	1176	756	984	1152
	1068	1164		576	912	1116
	Fig.1m
	1 m.p.i.				5 m.p.i.
	Neuα-syn	Oligα-syn	Ctrl-NeuN	Ctrl-MBP	Neuα-syn	Oligα-syn	Ctrl-NeuN	Ctrl-MBP
	1310.12	1301.62	0	0	7118.88	18725.1	0	0
	2034	3044.38	0	0	10409.2	15728.9	0	0
	2111.88	2334.88	0	0	8799	12579.2	0	0
	2596.38	2529.88			8272	10584.4	0	0

## Sheet: Fig.2
	Fig.2d				Fig.2e
	PD	MSA	HC		PD	MSA	HC
	77.5219	83.0044	74.2325		78.6184	51.8299	90.6798
	78.6184	100.729	90.9846		75.3289	75.3289	75.3289
	80.8114	84.0625	69.8465		77.5219	79.7149	83.0044
	101.645	81.9792	90.3125		70.943	68.75	73.136
	118.654	147.697	76.4254		72.0395	89.5833	75.3289
	111.513	82.9427	75.3289		79.7149	89.5833	76.4254
	86.2939	131.95	107.127		95.0658	112.61	70.943
	97.2588	129.95	76.4254		83.0044	85.5283	91.7917
	95.9635	143.688	106.593		117.146	86.8924	69.0833
	92.0573	123.688	86.8924		133.443	36.5521	98.25
	136.812	114.767	69.4222		88.4868	83.875	76.7917
	124.167	178.017	94.3905		100.75	56.1667	68.2
	122.083	69.4222	97.5333		107.625	53.25	100.851
	132.5	134.898			153.25	28.565
	Fig.2f
	Time (h)	PD-NEV														MSA-OEV														HC-NEV													HC-OEV
	0	19	20	19.75	17.5	19	16.6	17.4	15.6	91	92	40	37	19.3333	96.2	18.75	17.75	18	16	17	15.6	17.2	16.6	91.8	91.2	17.5	17.75	20.8	17.2	17.25	33.25	16.2	34	22.2	15.6	15	15.8	15.8	15.8	17.4	15.6	18.4	22.2	19.6	18	18.8	15.2	17	15.8
	6	23	26.5	24.75	21.25	22.5	16.4	16.8	16.4	91	92	40.5	38	22	96.2	19.25	19.25	18.5	16	16.2	15.8	16	16.2	91.8	91.2	19	18.25	24.4	16.6	18.75	36.75	29.8	33.5	24.2	29.8	22	17	16.8	20.2	22.8	14	22.6	24.8	19.8	24	19.6	13.6	18.8	18.2
	12	27.25	31	27.75	22.5	25.5	17.8	16.6	16.6	91.6	92.6	49.25	46.75	24.3333	99	19.25	20.25	18.5	18.4	16	16	16.8	16.4	92.2	91.4	19.5	19.25	30	17	19.25	47	38.6	40	27.6	35.8	28.4	18.4	18	24.8	28	13.2	28.2	30	20	27.6	22.2	13.6	21	19.6
	18	32.75	35.5	31.5	24	28	30.2	17.4	20.8	92.8	97.8	58.75	56	26	102.8	21	21.5	20	30.4	20	16.4	22.6	16	93.6	92.2	21	20	33.6	18.2	20.5	58.5	42.6	46	29.6	38.4	32.4	18.8	18.8	28	32.2	13.6	32.6	33	20.6	30	24	13.6	21.6	20
	24	40.25	38	33.75	26.5	31	45.2	24.2	34.4	92	103.6	67.25	65	27	105.4	21.75	22.25	19.75	42.8	26	19.4	32.6	17	93.8	91	22	21.25	35.4	24.2	21	68.5	46.2	53.25	31	39	36.4	20.2	19.8	32	36.2	14.6	36	34.8	21.2	32	25.2	14	23	21.8
	30	103.75	40.25	36	29	34.25	55.2	44.8	69.8	98.2	107.6	74.75	73.5	27.6667	114.8	23.5	23	21	51.6	33.2	24	40.6	19	100.2	92.4	23.25	22	36.2	31.8	21.75	75.75	48.8	60.25	31.8	40.8	39.8	21.4	21	35.2	39.8	14.6	39	35.4	21.2	34	26.6	14.2	23.8	22.8
	36	219.25	41.5	38.25	31.25	37.75	62.2	68.4	137.2	100.2	112.6	80	80.25	27.6667	125.2	30.75	24.25	25.75	59.4	39.8	31.6	44.4	25.6	101.2	92	26	24	36.6	49.4	22.25	79.75	48.8	66.75	32.6	41	40.6	21.2	20.8	35.8	40.2	14	39.8	36.2	21	34.4	26.6	14.4	23.6	22.8
	42	255.75	43.75	41.75	36.75	44.75	62.8	96	208.8	100.4	116.4	81.5	85	27	144.4	42.25	27	33	62.2	56.2	34	50	35.2	102	93.2	33	27.5	35.6	70.6	24.25	82.75	48.4	71.5	31.8	40.8	41.2	21.6	21	37.2	40.8	14	40.4	35	20.6	34.2	26.6	13.8	23.6	22.6
	48	289.5	46.5	48	50.75	58.75	66	211	328.8	101.8	118	82.25	88	27.3333	202.8	53	30.25	41	87.4	66.8	39	73.6	45.6	103	94	39.25	31	34.8	89.4	27.5	82.25	49.4	73.5	32.4	41.2	42.2	21.8	21.6	38.6	43	14.8	41.4	34.8	21.4	35.2	27.6	14.8	24.4	23.6
	54	312.5	51.75	121.25	76.25	115.75	84	291	461.2	113.4	125.4	81.5	89	26.3333	269.2	65.75	38	50.5	120	81.2	54	112.8	63	106.8	100.6	48.25	34.75	33.8	104.8	32.5	82.75	49	74.25	31.8	40.8	41.6	21.6	21.8	38.6	42.4	14.4	42.2	33.8	21	35.2	27.6	15	24.2	23.2
	60	337.75	59.25	213.5	94	326	123.6	303.4	512.6	141.8	130.8	80.5	89	26	299	78.5	56.75	58.25	147.4	95.8	74.8	153.2	109.8	148.8	107.6	60	40	32.2	125	41	81.5	47	75	31	31	42	20	22	39	43	15	40	32.8	20.6	36	27	14	23	23
	66	385	71.5	262	115.75	449.5	160	309.6	548.8	186	147.4	78.75	88.25	25	349.8	91.5	77.75	65.25	174.4	137.4	94	192.2	195.6	173	133.2	73	45.25	30.8	146.4	53	80	52	73.75	30.8	34	46	24	25	42	47	17	45	31.8	20.8	39	30	14	23	22
	72	476.75	91.75	369	140	497.75	181	312.4	564	212.4	165.4	77.25	87	24	422.2	114.25	132.5	72.25	184.4	164.4	105.2	218.2	321.4	190.2	144.6	91.5	51.5	28.8	160.6	65.5	78.25	50	73	30	30	44	21	21	39	44	16	41	29.6	20.2	34	28	16	24	23
	78	596.5	129	526.25	161.25	562	194.2	333.4	567	290	221.4	75.25	86.25	23.3333	427.2	131.25	177.25	77	189.6	164.8	115	237.8	495.8	308	180.8	103.25	59.75	28.2	172.8	75.25	75.75	47	70.5	29.6	31	42	22	22	41	43	16	41	28.8	20.4	35	27	14	25	25
	84	689.75	180.25	636.25	184.5	640.25	206.6	351.8	592.2	306.2	229	73.5	86.75	23.3333	456	148.5	221	83.5	192.2	178.6	119.6	252	641.8	329	184.2	118	67	26.8	185.8	86.75	74.75	48	70	29	30	40	21	21	37	41	18	41	28	20.4	35	27	12	23	23
	90	718.25	203	675.5	203.5	703.75	217.8	372.4	592.4	315.8	246.6	72.75	86	22.3333	477.6	161	246	87.25	190.8	188.8	121.4	263.8	720.6	339.8	199.6	128	71.5	25.8	197.8	96.5	73.75	47	67.75	34.6	29	40	21	19	36	40	19	38	26.4	20.2	34	26	14	23	22
	Fig.2g							Fig.2h					Fig.2j
	PD-NEV	PD-OEV	MSA-NEV	MSA-OEV	HC-NEV	HC-OEV		PD	MSA	HC			α-SynPD-NEV			α-SynMSA-OEV
	718.25	30	116	161	96.5	26.4		23.9417	0.602484	3.4596			Period (nm)	Height (nm)		Period (nm)	Height (nm)
	203	60	318.4	246	73.75	20.2		4	0.398374	3.65099			0	1.12293		0	0.1581
	675.5	16	99.4	87.25	47	34		19.9667	0.286533	1.38235			4.29	1.15752		4.01	0.247506
	203.5	16	98.8	190.8	67.75	26		14.7292	0.146751	2.60577			8.58	1.08194		8.02	0.471541
	703.75	19	101.2	188.8	34.6	14		46.7719	0.169492	2.47143			12.86	0.972474		12.03	0.763601
	217.8	15	25	121.4	29	23		14.52	0.280066	1.26087			17.15	0.829087		16.04	1.04397
	372.4	15	28	263.8	40	22		10.9048	0.374337	1.81818			21.44	0.817005		20.04	1.38714
	592.4	16	32	720.6	21	13		37.025	0.441854	1.61538			25.73	0.676826		24.05	1.68584
	315.8	37	34	339.8	19	30		8.53514	0.341377	0.633333			30.01	0.687831		28.06	1.8626
	246.6	42	27	199.6	36	16		16.44	0.135271	2.25			34.3	0.558079		32.07	2.04922
	72.75	30	13	128	40	27		2.425	0.101562	1.48148			38.59	0.531412		36.08	2.15061
	86	13	13	71.5	19	14		6.61538	0.181818	1.35714			42.88	0.759135		40.09	2.16623
	22.3333	14	13	25.8	38	14		1.59524	0.503876	2.71429			47.16	1.47415		44.1	2.13817
	477.6	20	32	197.8				28.4875	0.16178				51.45	2.62224		48.11	1.9883
													55.74	3.74192		52.12	1.74476
	Fig.2k												60.03	5.20832		56.12	1.43683
		0.5 μM		1 μM									64.31	6.76013		60.13	1.17818
	PBS	α-SynPD-NEV fibrils	α-SynMSA-OEV fibrils	α-SynPD-NEV fibrils	α-SynMSA-OEV fibrils								68.6	8.10163		64.14	0.830164
	99.7247	54.2273	41.8797	72.906	37.7507								72.89	8.99517		68.15	0.476886
	99.9607	63.2717	64.5301	56.4294	62.0134								77.18	9.50176		72.16	0.248633
	100.315	63.8223	60.2831	64.0975	42.1943								81.47	9.53014		76.17	0.0868597
		62.6032	43.3346	62.9965	49.1152								85.75	9.22913		80.18	1.72727e-06
													90.04	8.61244		84.19	0.00756
													94.33	7.55705		88.2	0.124442
													98.62	6.33345		92.21	0.418298
	Fig.2m												102.9	4.81645		96.21	0.797425
	PBS	α-SynPD-NEV fibrils	α-SynMSA-OEV fibrils										107.19	3.4949		100.22	1.12895
	0	0.173717	0.309795										111.48	2.46123		108.24	1.49041
	4.63995e-07	0.263568	0.296037										115.77	1.98304		112.25	1.82936
	8.11993e-06	0.158757	0.230442										120.05	1.72412		116.26	2.11796
	2.43583e-05	0.0823422	0.376242										124.34	1.59726		120.27	2.43545
													128.63	1.31286		124.28	2.58992
													132.92	1.14306		128.29	2.62625
													137.2	0.946588		132.29	2.59468
													141.49	0.752224		136.3	2.54544
													145.78	0.637929		140.31	2.31719
													150.07	0.526792		144.32	1.92771
													154.36	0.477996		148.33	1.60266
													158.64	0.397397		152.34	1.24641
													162.93	0.385776		156.35	0.904703
													167.22	0.459917		160.36	0.690481
													171.51	0.71447		164.37	0.355726
													175.79	0.809615		168.37	0.193977
													180.08	0.924201		172.38	0.0907148
													184.37	0.984025		176.39	0.468862
													188.66	1.07602		180.4	1.57257
													192.94	1.12824		184.41	1.78894
													197.23	1.50207		188.42	1.97968
													201.52	2.038		192.43	2.14428
													205.81	2.56608		196.44	2.1743
													210.09	3.22139		200.45	2.07898
													214.38	4.03793		204.45	1.91864
													218.67	4.94281		208.46	1.79737
													222.96	5.85455		212.47	1.51631
													227.25	6.76697		216.48	1.30662
													231.53	7.5486		220.49	1.15018
													235.82	8.19518		224.5	0.849432
													240.11	8.65066		228.51	0.69032
													244.4	8.60781		232.52	0.308401
													248.68	8.30827		236.53	0.162771
													252.97	7.61562		240.53	0.0882439
													257.26	6.72961		244.54	0.35816
													261.55	5.68138		248.55	0.558404
													265.83	4.84047		252.56	1.5131
													270.12	3.6812		256.57	1.72153
													274.41	2.58421		260.58	1.81654
													278.7	1.78006		264.59	1.88993
													282.98	1.33978		268.6	1.87235
													287.27	0.889119		272.61	1.76248
													291.56	0.570368		276.62	1.53797
													295.85	0.553301		280.62	1.33628
													300.14	0.699229		284.63	0.933433
													304.42	0.833929		288.64	0.719629
													308.71	0.975842		292.65	0.532258
													313	1.0978		296.66	0.139906
													317.29	1.15819
													321.57	1.22507
													325.86	1.27907
													330.15	1.37681
													334.44	1.56983
													338.72	1.78836
													343.01	1.99858
													347.3	2.32705
													351.59	2.60459
													355.87	3.53517
													360.16	4.56413
													364.45	5.82438
													368.74	7.28204
													373.02	8.62339
													377.31	9.84766
													381.6	10.7943
													385.89	11.3288
													394.46	11.5031
													407.33	10.9597
													415.9	9.93926
													420.19	8.62067
													424.48	7.50632
													428.76	6.3242
													433.05	5.08881
													437.34	3.95471
													441.63	3.36588
													445.91	2.55641
													450.2	1.69252
													454.49	0.796617
													458.78	0.484939
													463.07	0.360562
													467.35	0.202828
													471.64	0.288197
													475.93	0.333179
													480.22	0.359017
													484.5	0.414568
													488.79	0.484453
													493.08	1.01789
													497.37	1.66117
													501.65	2.65392
													505.94	3.53431
													510.23	4.56093
													514.52	5.5692
													518.8	6.93282
													523.09	7.96705
													531.67	9.17226
													535.96	10.2103
													540.24	10.7702
													544.53	10.7007
													553.11	10.1854
													557.39	9.03739
													561.68	7.79264
													565.97	6.7419
													570.26	5.64753
													574.54	4.37666
													578.83	3.27636
													583.12	2.05571
													587.41	1.25837
[truncated: 34 more columns]

## Sheet: Fig.3
	Fig.3e
	1 m.p.i.			3 m.p.i.			5 m.p.i.
	Neuα-syn+NEV	Oligα-syn+OEV	Ctrl	Neuα-syn+NEV	Oligα-syn+OEV	Ctrl	Neuα-syn+NEV	Oligα-syn+OEV	Ctrl
	1.44288	1.35477	1.02484	1.48265	1.59034	0.971394	1.43827	1.49841	1.01226
	1.44391	1.33758	1.06571	1.58094	1.42177	1.06424	1.47873	1.52044	1.02983
	1.37565	1.41286	0.951081	1.17348	1.43133	0.977753	1.58046	1.58592	1.07807
	1.1598	1.08984					1.70602	1.54044	0.915877
	1.30217	1.20469
	Fig.3f
	1 m.p.i.			3 m.p.i.			5 m.p.i.
	Neuα-syn+NEV	Oligα-syn+OEV	Ctrl	Neuα-syn+NEV	Oligα-syn+OEV	Ctrl	Neuα-syn+NEV	Oligα-syn+OEV	Ctrl
	77.0833	87.2727	51.978	70.8537	79.8077	53.5268	85.6897	69	54.6552
	73.6207	87.6923	53.0769	65	62.7273	72.7419	84.1176	64	67.337
	69.0476	87	78.4459	77.2973	47.3134	68.9238	90	65.4902	61.85
	74.0179	48.5246					83.0769	67.3148	36.0769
	100.278	75
	Fig.3g
	1 m.p.i.			3 m.p.i.			5 m.p.i.
	Neuα-syn+NEV	Oligα-syn+OEV	Ctrl	Neuα-syn+NEV	Oligα-syn+OEV	Ctrl	Neuα-syn+NEV	Oligα-syn+OEV	Ctrl
	36	22	106	41	26	112	29	45	87
	29	13	92	39	33	89	34	65	92
	21	10	90	37	67	96	25	51	100
	56	61					13	54	79
	18	29
	Fig.3h
	1 m.p.i.			3 m.p.i.			5 m.p.i.
	Neuα-syn+NEV	Oligα-syn+OEV	Ctrl	Neuα-syn+NEV	Oligα-syn+OEV	Ctrl	Neuα-syn+NEV	Oligα-syn+OEV	Ctrl
	3.21	2.22	5.47	3.36	2.4	6.94	2.88	3.59	5.5
	2.47	1.32	5.59	2.93	2.4	5.22	3.31	4.81	7.17
	1.68	1.01	6.28	3.31	3.67	6.37	2.6	3.87	7.16
	4.8	3.43					1.25	4.21	6.13
	2.09	2.52
	Fig.3j
	1 m.p.i.			3 m.p.i.			5 m.p.i.
	Neuα-syn+NEV	Oligα-syn+OEV	Ctrl	Neuα-syn+NEV	Oligα-syn+OEV	Ctrl	Neuα-syn+NEV	Oligα-syn+OEV	Ctrl
	888	1044	1248	834	1116	1332	648	906	1272
	852	960	1344	696	1098	1296	702	768	1188
	1032	936	1176	756	846	1380	534	876	1152
	948	1056					348	708	1116
	Fig.3k
	1 m.p.i.			3 m.p.i.			5 m.p.i.
	Neuα-syn+NEV	Oligα-syn+OEV	Ctrl	Neuα-syn+NEV	Oligα-syn+OEV	Ctrl	Neuα-syn+NEV	Oligα-syn+OEV	Ctrl
	10203.2	9397	0	12220.8	35151.4	0	19760.4	42115.8	0
	10744.5	13712.6	0	11613.8	33254.1	0	14668.8	49156.2	0
	8943	13744.6	0	13776.6	28992.4	0	13038.5	55887.5	0
	8930.75	9641.62					15520.8	27395.1	0
	Fig.3l			Fig.3m
	SLD neuron count	EMG(REM)/EMG(NREM)		SLD neuron count	pS129 α-syn+ area
	888	1.44391		888	10203.2
	852	1.37565		852	10744.5
	1032	1.1598		1032	8943
	948	1.30217		948	8930.75
	1044	1.35477		1044	9397
	960	1.33758		960	13712.6
	936	1.41286		936	13744.6
	1056	1.08984		1056	9641.62
	1224	1.06		1224	1310.12
	1092	1.04711		1092	2034
	1152	1.09516		1152	2111.88
	1068	1.06395		1068	2596.38
	1236	1.10286		1236	1301.62
	1128	1.06755		1128	3044.38
	1332	1.11101		1332	2334.88
	1164	1.01169		1164	2529.88
	1248	1.02484		1248	0
	1344	1.06571		1344	0
	1176	0.951081		1176	0
	834	1.48265		834	12220.8
	696	1.58094		696	11613.8
	756	1.17348		756	13776.6
	1116	1.59034		1116	35151.4
	1098	1.42177		1098	33254.1
	846	1.43133		846	28992.4
	1332	0.971394		1332	0
	1296	1.06424		1296	0
	1380	0.977753		1380	0
	648	1.43827		648	19760.4
	702	1.47873		702	14668.8
	534	1.58046		534	13038.5
	348	1.70602		348	15520.8
	906	1.49841		906	42115.8
	768	1.52044		768	49156.2
	876	1.58592		876	55887.5
	708	1.54044		708	27395.1
	672	1.40606		672	7118.88
	612	1.13946		612	10409.2
	756	1.1422		756	8799
	576	1.37768		576	8272
	936	1.19518		936	18725.1
	1032	1.24527		1032	15728.9
	984	1.3069		984	12579.2
	912	1.20918		912	10584.4
	1272	1.01226		1272	0
	1188	1.02983		1188	0
	1152	1.07807		1152	0
	1116	0.915877		1116	0

## Sheet: Fig.4
	Fig.4b
	1 m.p.i.			3 m.p.i.			5 m.p.i.
	Neuα-syn+NEV	Oligα-syn+OEV	Ctrl	Neuα-syn+NEV	Oligα-syn+OEV	Ctrl	Neuα-syn+NEV	Oligα-syn+OEV	Ctrl
	265.333	247	295.333	220.667	226.667	271.333	98.3333	185.333	286
	195.667	277.333	282	182.667	217.667	288	169.667	221	293.667
	266.333	283	276.667	184	207.667	276.667	114.333	230.667	284
	164	244.333	279	155	212.333	277.667	129	192	284.667
	250.667	265	291.667	124	175.333	268.333	199.333	245.667	295.333
	263	277		224.333	272.333		176	206.333
	274.667	292		193.667	251.667		185.667	233
	Fig.4c
	1 m.p.i.			3 m.p.i.			5 m.p.i.
	Neuα-syn+NEV	Oligα-syn+OEV	Ctrl	Neuα-syn+NEV	Oligα-syn+OEV	Ctrl	Neuα-syn+NEV	Oligα-syn+OEV	Ctrl
	12.6	14	10.8	22.8	20.4	15	25	17.8	14.6
	21.4	12.2	11	19.2	20	13.2	23.4	22	13.6
	12	12.4	10.8	24.2	17.4	12.6	26.6	20.2	14
	19	11.4	11.6	22.8	19.8	14.2	22.2	19.6	13.2
	12.6	11.2	11.8	20.8	21.4	14.8	23.4	16.4	12.4
	12.2	12.8		19.4	14.6		16.8	18.6
	12.8	11.4		17	18.2		22.6	17.8
	Fig.4g
	1 m.p.i.			3 m.p.i.			5 m.p.i.
	Neuα-syn+NEV	Oligα-syn+OEV	Ctrl	Neuα-syn+NEV	Oligα-syn+OEV	Ctrl	Neuα-syn+NEV	Oligα-syn+OEV	Ctrl
	1.10853	1.14474	1.25313	1.10499	1.08219	1.16401	1.07939	1.09819	1.20521
	1.04003	1.15295	1.18079	1.05243	1.11223	1.21521437308711	1.04178	1.09996	1.17141
	1.13584	1.10141	1.13648	1.08165	1.15843	1.19663	1.05614	1.08472	1.20642
	1.0348	1.21063	1.16739	1.09049	1.09819	1.18247	1.03797	1.12788	1.18457
	Fig.4h
	1 m.p.i.			3 m.p.i.			5 m.p.i.
	Neuα-syn+NEV	Oligα-syn+OEV	Ctrl	Neuα-syn+NEV	Oligα-syn+OEV	Ctrl	Neuα-syn+NEV	Oligα-syn+OEV	Ctrl
	9468	10158	11502	6726	8004	10344	4902	8742	10104
	10278	10512	10734	7302	8994	11142	4392	6216	10650
	10194	10788	10554	8166	8334	10938	5682	6918	10038
	9606	10926	10896	7470	9066	10110	5934	7374	11034
	Fig.4i
	1 m.p.i.				3 m.p.i.				5 m.p.i.
	Neuα-syn+NEV	Oligα-syn+OEV	Ctrl-Neu	Ctrl-MBP	Neuα-syn+NEV	Oligα-syn+OEV	Ctrl-Neu	Ctrl-MBP	Neuα-syn+NEV	Oligα-syn+OEV	Ctrl-Neu	Ctrl-MBP
	4698	3534	0	0	16329	3922	0	0	29994	10268	0	0
	2494	2573	0	0	10240	4139	0	0	27688	9942	0	0
	6329	4014	0	0	13494	5236	0	0	30296	11174	0	0
	5494	4356	0	0	14769	4104	0	0	31519	12836	0	0

## Sheet: Fig.5
	Fig.5b
	1 m.p.i.			3 m.p.i.			5 m.p.i.
	Neuα-syn+NEV	Oligα-syn+OEV	Ctrl	Neuα-syn+NEV	Oligα-syn+OEV	Ctrl	Neuα-syn+NEV	Oligα-syn+OEV	Ctrl
	37	19	21	67	59	17	132	59	21
	33	15	13	60	51	25	100	83	13
	26	22	24	86	52	13	85	67	18
	20	24	17	76	40	27	73	58	16
	28	31	18	66	46	20	99	72	25
	18	15		55	32		69	42
	21	16		68	49		48	37
	Fig.5d
	1 m.p.i.			3 m.p.i.			5 m.p.i.
	Neuα-syn+NEV	Oligα-syn+OEV	Ctrl	Neuα-syn+NEV	Oligα-syn+OEV	Ctrl	Neuα-syn+NEV	Oligα-syn+OEV	Ctrl
	33.5601	36.5545	39.759	34.5679	19.424	40.8892	24.8408	22.9041	40.2688
	43.7697	23.8034	34.6904	32.9484	21.231	38.7692	27.7411	12.071	37.0865
	32.5995	21.3139	43.8363	27.4956	23.8657	39.1608	30.3725	16.8639	42.0379
	27.6153	35.1525	41.2869	22.1757	27.133	45.5696	25.9717	13.668	34.3819
	34.5613	28.8393	33.0519	28.9352	20.7106	35.137	22.4775	15.0493	38.1545
	36.7442	36.8644		31.5911	32.5816		26.8549	16.4959
	31.8097	30.8585		36.8895	24.7305		26.8648	26.77
	Fig.5f
	1 m.p.i.			3 m.p.i.			5 m.p.i.
	Neuα-syn+NEV	Oligα-syn+OEV	Ctrl	Neuα-syn+NEV	Oligα-syn+OEV	Ctrl	Neuα-syn+NEV	Oligα-syn+OEV	Ctrl
	12.2479	16.7778	6.4127	4.00397	10	-3.08333	12.2479	14.1296	-8.16667
	10.2333	4.83333	3	-7.33334	6.08547	-1.66666	12.7167	20.4074	5.38889
	8.83334	12.1667	-0.666664	1.14441	4.72226	-2.33334	16.1667	13.7071	6.25
	-1.66667	12	1.66667	-4.71429	3.78572	-0.944445	20.8444	16.7857	2.31111
	0.833335	14.1333	-5.5	-1.13095	13.9524	4.33333	8.9697	29.25	9.92592
	6.88889	-6.61905		6	3.76191		12.6556	10.8333
	-5.06945	10.1667		-2.33333	0.259256		13.9167	9.33333

## Sheet: Supplementary Fig. 3
	Supplementary Fig. 3a
	Time (h)	PD-NEV#1	PD-NEV#2	PD-NEV#3	PD-NEV#4	PD-NEV#5	PD-NEV#6	PD-NEV#7	PD-NEV#8	PD-NEV#9	PD-NEV#10	PD-NEV#11	PD-NEV#12	PD-NEV#13	PD-NEV#14		HC-NEV#1	HC-NEV#2	HC-NEV#3	HC-NEV#4	HC-NEV#5	HC-NEV#6	HC-NEV#7	HC-NEV#8	HC-NEV#9	HC-NEV#10	HC-NEV#11	HC-NEV#12	HC-NEV#13		MSA-NEV#1	MSA-NEV#2	MSA-NEV#3	MSA-NEV#4	MSA-NEV#5	MSA-NEV#6	MSA-NEV#7	MSA-NEV#8	MSA-NEV#9	MSA-NEV#10	MSA-NEV#11	MSA-NEV#12	MSA-NEV#13	MSA-NEV#14
	0	19	20	19.75	17.5	19	16.6	17.4	15.6	91	92	40	37	19.3333	96.2		17.25	33.25	16.2	34	22.2	15.6	15	15.8	15.8	15.8	17.4	15.6	18.4		91.6	93.4	91.6	92.2	91	15.2	15.6	17.6	16.8	15.4	15.4	15.4	16	15.2
	6	23	26.5	24.75	21.25	22.5	16.4	16.8	16.4	91	92	40.5	38	22	96.2		18.75	36.75	29.8	33.5	24.2	29.8	22	17	16.8	20.2	22.8	14	22.6		91.6	93.4	91.6	92.2	91	18.8	19.2	18.2	21.8	14.6	14	14	13.6	15.8
	12	27.25	31	27.75	22.5	25.5	17.8	16.6	16.6	91.6	92.6	49.25	46.75	24.3333	99		19.25	47	38.6	40	27.6	35.8	28.4	18.4	18	24.8	28	13.2	28.2		92.2	94	92.2	92	91.4	22.4	22	19.8	26.2	14.6	13	13.6	13.8	16.6
	18	32.75	35.5	31.5	24	28	30.2	17.4	20.8	92.8	97.8	58.75	56	26	102.8		20.5	58.5	42.6	46	29.6	38.4	32.4	18.8	18.8	28	32.2	13.6	32.6		93.4	95	92.4	92.2	92	23.4	24.2	21.8	29.2	14.2	13.2	13.4	13.2	17.2
	24	40.25	38	33.75	26.5	31	45.2	24.2	34.4	92	103.6	67.25	65	27	105.4		21	68.5	46.2	53.25	31	39	36.4	20.2	19.8	32	36.2	14.6	36		92.8	95.4	91.8	91.2	91	25	26.4	25	31.6	15.4	13.6	14.2	14.2	19.2
	30	103.75	40.25	36	29	34.25	55.2	44.8	69.8	98.2	107.6	74.75	73.5	27.6667	114.8		21.75	75.75	48.8	60.25	31.8	40.8	39.8	21.4	21	35.2	39.8	14.6	39		97.2	101.8	92.4	91.6	91.6	26	28	27.4	33.4	15.6	14.4	14.8	15.2	22
	36	219.25	41.5	38.25	31.25	37.75	62.2	68.4	137.2	100.2	112.6	80	80.25	27.6667	125.2		22.25	79.75	48.8	66.75	32.6	41	40.6	21.2	20.8	35.8	40.2	14	39.8		98.8	106.2	93	92	92.8	26.2	28.6	28	33.4	16.2	14	13.8	14.2	23.8
	42	255.75	43.75	41.75	36.75	44.75	62.8	96	208.8	100.4	116.4	81.5	85	27	144.4		24.25	82.75	48.4	71.5	31.8	40.8	41.2	21.6	21	37.2	40.8	14	40.4		99.6	111.4	93.2	92	93.4	25.6	28.6	29.6	34.6	17.4	14	14	13.8	32.8
	48	289.5	46.5	48	50.75	58.75	66	211	328.8	101.8	118	82.25	88	27.3333	202.8		27.5	82.25	49.4	73.5	32.4	41.2	42.2	21.8	21.6	38.6	43	14.8	41.4		101.4	119	94.4	93.6	95.2	26.2	29.6	31	35.6	18.2	14.6	15	15	40.6
	54	312.5	51.75	121.25	76.25	115.75	84	291	461.2	113.4	125.4	81.5	89	26.3333	269.2		32.5	82.75	49	74.25	31.8	40.8	41.6	21.6	21.8	38.6	42.4	14.4	42.2		106.2	131.6	97.2	97	99.2	26.4	29.4	31.4	36	17.4	14.4	14.8	15	44
	60	337.75	59.25	213.5	94	326	123.6	303.4	512.6	141.8	130.8	80.5	89	26	299		41	81.5	47	75	31	31	42	20	22	39	43	15	40		108.2	153.6	98.8	99	100.6	26	30	32	37	30	14	13	14	31
	66	385	71.5	262	115.75	449.5	160	309.6	548.8	186	147.4	78.75	88.25	25	349.8		53	80	52	73.75	30.8	34	46	24	25	42	47	17	45		111	195.6	99.2	99.6	101.2	30	33	32	34	33	17	19	18	35
	72	476.75	91.75	369	140	497.75	181	312.4	564	212.4	165.4	77.25	87	24	422.2		65.5	78.25	50	73	30	30	44	21	21	39	44	16	41		112	224.8	98.8	99.2	100.8	26	32	33	36	28	15	14	15	33
	78	596.5	129	526.25	161.25	562	194.2	333.4	567	290	221.4	75.25	86.25	23.3333	427.2		75.25	75.75	47	70.5	29.6	31	42	22	22	41	43	16	41		115.8	303.2	99.6	99.2	102	23	34	32	36	27	14	14	15	34
	84	689.75	180.25	636.25	184.5	640.25	206.6	351.8	592.2	306.2	229	73.5	86.75	23.3333	456		86.75	74.75	48	70	29	30	40	21	21	37	41	18	41		116.6	312.2	99	99	101.8	26	29	31	35	27	13	14	14	33
	90	718.25	203	675.5	203.5	703.75	217.8	372.4	592.4	315.8	246.6	72.75	86	22.3333	477.6		96.5	73.75	47	67.75	34.6	29	40	21	19	36	40	19	38		116	318.4	99.4	98.8	101.2	25	28	32	34	27	13	13	13	32
	Supplementary Fig. 3b
	Time (h)	PD-OEV#1	PD-OEV#2	PD-OEV#3	PD-OEV#4	PD-OEV#5	PD-OEV#6	PD-OEV#7	PD-OEV#8	PD-OEV#9	PD-OEV#10	PD-OEV#11	PD-OEV#12	PD-OEV#13	PD-OEV#14		MSA-OEV#1	MSA-OEV#2	MSA-OEV#3	MSA-OEV#4	MSA-OEV#5	MSA-OEV#6	MSA-OEV#7	MSA-OEV#8	MSA-OEV#9	MSA-OEV#10	MSA-OEV#11	MSA-OEV#12	MSA-OEV#13	MSA-OEV#14		HC-OEV#1	HC-OEV#2	HC-OEV#3	HC-OEV#4	HC-OEV#5	HC-OEV#6	HC-OEV#7	HC-OEV#8	HC-OEV#9	HC-OEV#10	HC-OEV#11	HC-OEV#12	HC-OEV#13
	0	15.2	19	16.6	15.2	16.6	14.2	17	17	17.8	18.2	16.4	15.2	16.4	15		18.75	17.75	18	16	17	15.6	17.2	16.6	91.8	91.2	17.5	17.75	20.8	17.2		22.2	19.6	18	18.8	15.2	17	15.8	16.4	15.6	15.6	16.4	15.2	15.4
	6	13.8	24.2	14.8	14.6	16	14	14.6	14.6	27	19.8	19.8	13.4	13.6	17		19.25	19.25	18.5	16	16.2	15.8	16	16.2	91.8	91.2	19	18.25	24.4	16.6		24.8	19.8	24	19.6	13.6	18.8	18.2	13.6	13.8	13.8	13.4	13.8	13.4
	12	13.8	33.6	15.4	14.6	16.4	14.4	14.4	14.4	40.2	21.6	23.8	13	12.6	18.4		19.25	20.25	18.5	18.4	16	16	16.8	16.4	92.2	91.4	19.5	19.25	30	17		30	20	27.6	22.2	13.6	21	19.6	13.4	13.6	14.2	13.2	13.2	13.6
	18	13.8	43.4	14.8	15.6	17	14.6	14.8	14.6	51.2	23	26.6	13	13	19.2		21	21.5	20	30.4	20	16.4	22.6	16	93.6	92.2	21	20	33.6	18.2		33	20.6	30	24	13.6	21.6	20	13.8	13	13.2	13.2	12.8	13
	24	14.8	53	16.4	15.8	18	15.4	15.4	15.2	58.4	24	29.2	13.4	13.8	20.4		21.75	22.25	19.75	42.8	26	19.4	32.6	17	93.8	91	22	21.25	35.4	24.2		34.8	21.2	32	25.2	14	23	21.8	14.2	14	13.8	14.2	13.6	14.2
	30	15.2	58.6	16.8	17	19.4	15.8	16	16.2	62	25	31	14	14	21.4		23.5	23	21	51.6	33.2	24	40.6	19	100.2	92.4	23.25	22	36.2	31.8		35.4	21.2	34	26.6	14.2	23.8	22.8	14.4	14.8	14.8	14	14.4	14.2
	36	14.6	61.6	16	16.2	19	16	15.6	15.4	62.8	24.4	31.2	13.6	13.8	21.2		30.75	24.25	25.75	59.4	39.8	31.6	44.4	25.6	101.2	92	26	24	36.6	49.4		36.2	21	34.4	26.6	14.4	23.6	22.8	13.8	14	14	13.8	13.8	14
	42	14.6	62.2	16.2	16.4	19.2	15.6	15.6	15.8	62.6	24.2	31.6	13.6	13.6	21		42.25	27	33	62.2	56.2	34	50	35.2	102	93.2	33	27.5	35.6	70.6		35	20.6	34.2	26.6	13.8	23.6	22.6	14.2	13.8	14.2	13.8	13.2	13.8
	48	15.2	64.4	17.2	16.8	20.2	16.2	16.4	16.2	62.8	24.8	32	14	14.2	21.8		53	30.25	41	87.4	66.8	39	73.6	45.6	103	94	39.25	31	34.8	89.4		34.8	21.4	35.2	27.6	14.8	24.4	23.6	15.2	14.8	14.8	14.8	14.8	14.8
	54	15.8	64.6	17.2	16.8	20	16.4	16.4	16.6	62	24.8	31.8	14.6	14.6	21.8		65.75	38	50.5	120	81.2	54	112.8	63	106.8	100.6	48.25	34.75	33.8	104.8		33.8	21	35.2	27.6	15	24.2	23.2	14.8	16.6	14.4	14.4	14.8	14.4
	60	27	64	17	17	18	16	16	17	41	55	32	15	14	21		78.5	56.75	58.25	147.4	95.8	74.8	153.2	109.8	148.8	107.6	60	40	32.2	125		32.8	20.6	36	27	14	23	23	15	17	16	15	14	15
	66	28	67	19	17	20	15	15	15	43	54	36	16	17	25		91.5	77.75	65.25	174.4	137.4	94	192.2	195.6	173	133.2	73	45.25	30.8	146.4		31.8	20.8	39	30	14	23	22	14	17	13	19	16	17
	72	26	64	18	16	21	15	15	17	40	49	32	13	15	23		114.25	132.5	72.25	184.4	164.4	105.2	218.2	321.4	190.2	144.6	91.5	51.5	28.8	160.6		29.6	20.2	34	28	16	24	23	14	22	15	21	15	13
	78	27	63	16	18	21	17	18	17	39	48	32	15	16	21		131.25	177.25	77	189.6	164.8	115	237.8	495.8	308	180.8	103.25	59.75	28.2	172.8		28.8	20.4	35	27	14	25	25	14	25	17	29	16	15
	84	29	62	16	16	20	16	17	17	37	44	32	14	12	20		148.5	221	83.5	192.2	178.6	119.6	252	641.8	329	184.2	118	67	26.8	185.8		28	20.4	35	27	12	23	23	14	27	14	30	13	14
	90	30	60	16	16	19	15	15	16	37	42	30	13	14	20		161	246	87.25	190.8	188.8	121.4	263.8	720.6	339.8	199.6	128	71.5	25.8	197.8		26.4	20.2	34	26	14	23	22	13	30	16	27	14	14

## Sheet: Supplementary Fig. 4
	Supplementary Fig. 4a			Supplementary Fig. 4b			Supplementary Fig. 4c			Supplementary Fig. 4e			Supplementary Fig. 4f
	α-SynPD-NEV fibrils	α-SynMSA-OEV fibrils		α-SynPD-NEV fibrils	α-SynMSA-OEV fibrils		α-SynPD-NEV fibrils	α-SynMSA-OEV fibrils		α-SynPD-NEV fibrils	α-SynMSA-OEV fibrils			α-SynPD-NEV fibrils	α-SynMSA-OEV fibrils
	146	102		29.4	22.2		11.7	7.62		10.8	13.5		Twisted fibrils	68	62
	121	98		21.5	17.6		8.75	8.79		17.8	17.9		Straight fibrils	118	194
	116	106		21.1	21.4		9.15	10.3		16.5	12.8
	115	103		24.3	17.8		9.23	10.1		11.2	10.7
	118	98.1		22.3	24		7.77	10.1		15.9	17.1
	121	95.8		23.6	21.4		9.15	8.79		14.3	16.4
	122	91.5		23.8	22.2		8.88	10.9		16.3	12.6
	118	99		22.3	22.2		9.12	9.81		10.1	12.9
	108	101		16.1	18.7		8.91	6.97		10.7	19.1
	110	116		17.9	20.6		8.88	9.57		10.7	12.6
	94.8	98.3		26.4	18.6		8.88	7.51		13.4	15.1
	119	103		20.3	19.9		8.79	9.1		18.3	17.5
	96.5	101		19	24.7		8.89	9.9		14.2	15.5
	84.6	93.5		24.3	22.3		8.43	11		12.4	16.1
	87.8	112		24.8	21.1		9.8	10.4		13.6	15.9
	112	108		24.5	24		9.06	9.15		12.6	15.3
	117	102		24.8	22.6		8.88	10.3		16.4	17.8
	120	87.9		24.2	22.8		9.1	10.8		9.57	19.5
	117	99		25.3	21.5		9.9	10.4		9.15	15.9
	123	95		24.8	23.9		8.43	11.4		14.3	17.5
	107	94.3		22	24.2		10.1	11.8		13.6	14.7
	103	93.2		20.6	25.1		6.77	11.3		17.6	15.2
	102	99.3		24	25.1		7.64	11.6		12.4	15.9
	103	94.2		21.4	22.6		8.88	8.79		11.9	11.9
	109	93.5		24.9	23.9		9.57	10.1		11.2	18
	110	111		20.4	23.9		9.4	8.79		17.6	14
	113	102		21.5	22.6		9.86	10.4		10.1	9.42
	118	107		18.7	22.8		8.04	10.1		13.4	13.9
	115	103		24	22.3		8.96	9.15		8.77	11.9
	112	104		19.6	23.7		9.7	6.77		10.1	9.57
	100	97.8		20.6	23.8		9.8	9.81		17.2	12.6
	111	84.6		20.9	22.6		9.06	8.9		11.9	13.4
	102	93.3		21.9	21.9		8.88	10.4		11.9	19.9
	110	82.4		18	20.7		8.57	10.4		7.86	17.1
	106	97.3		18.7	24.7		9.57	10.4		7.94	9.81
	102	100		18.1	25.4		8.25	9.15		10.8	15.6
	96.5	88		20.3	24.7		9.2	9.57		14.9	17.2
	104	102		21.4	23.8		8.04	8.88		12.8	15.9
	102	102		25.4	21.7		8.43	10		9.6	14.6
	93.1	103		27.8	21.5		9.4	8.6		6.79	17.2
	82	88.2		20.6	19		8.04	8.77		14.3	19.2
	104	105		18.8	21.6		7.28	7.09		12.7	16.3
	96.7	92.6		24	19.2		9.06	7.09		8.1	21.3
	125	99.7		22.6	21.1		8.79	8.88		14.1	16.8
	155	105		20.6	21.5		8.43	8.43		14.2	12.6
	104	87.2		21.9	22.3		8.15	10.8		9.81	12.4
	110	99		23.8	18.7		8.04	8.88		14.3	19.5
	110	101		21.5	19		8.88	8.88		9.15	19.2
	86.7	98.7		22.3	24.7		7.95	10.1		16	19.5
	104	101		21.5	19.9		6.58	8.43		12.8	16.8
	121	98.7		22.5	17.5		7.95	8.04		11.9	15.9
	132	101		22.5	22.3		7.95	7.33		9.81	19.9
	135	86.1		20.8	22.8		6.41	9.15		12.6	11.6
	137	94.4		22.3	20.3		8.79	8.04		14.1	18.3
	139	96.2		22.9	17.9		8.6	7.11		12.8	12.9
	126	106		23.9	19.7		8.88	6.77		12.6	11.9
	138	116		21.4	19.2		8.79	8.04		11.4	17.6
	128	102		17.6	19.2		7.54	8.04		17.6	13.4
	105	94.8		23.2	21.7		8.88	7.64		11.4	19.2
	96.2	122		18.7	14.7		7.33	6.52		9.06	19
	100	109		18.1	21		8.04	6.74		13.9	13.9
	91.5	108		25.3	20.1		8.43	8.79		12.9	15.6
	96.6	98.4		22.4	21.4		8.81	8.88		13.7	11.9
	96.3	92.6		20.5	20.1		8.04	9.1		14	12.4
	107	95.5		25.1	20.1		10.8	8.88		12.6	10.8
	102	94.6		25.4	21.4		10.1	7.95		13.5	15.5
	99.6	109		19.5	25.1		8.04	8.04		9.81	16.3
	104	114		24.1	22.6		8.04	7.95		11.6	15.5
	105	94.8		16.9	19		8.91	6.77		11.9	15.3
	103	97.4		19.6	19.2		8.81	6.41		13.6	16.8
	98.7	96.4		21.4	20.5		7.28	7.54		14.7	10.7
	100	99.3		21.6	23.4		9.06	7.95		13.5	16.5
	105	96		22.6	18.2		10.2	8.3		15.1	17.6
	96.2	98.1		22.8	20.2		9.4	8.6		15.1	11.6
	102	105		23.9	24.7		7.54	9.06		10.8	12.8
	107	104		19	20.9		9.15	8.53		15.5	7.95
	97.3	95.7		21.5	20.5		7.64	8.43		12.4	20.2
	102	101		14	19.5		9.4	8.88		12.6	11.6
	102	100		22.8	22.6		10.7	7.64		9.06	17.8
	94.8	116		23.2	22.5		9.15	8.88		12.8	13.5
	101	119		22.3	21.5		9.57	7.64		18	15.3
	94.5	105		23.8	18.9		12.4	7.64		14	17.1
	110	108		19.5	18.1		9.81	7.95		13.6	12.4
	111	117		23.1	20.7		9.9	8.88		12.8	13.1
	109	89.6		21.4	20.3		9.81	9.15		15.3	10.8
	107	86.9		17.5	20.3		9.06	10.1		11.6	17.8
	90.6	98		22	19		10.4	7.95		10.1	15.9
	102	98		20.7	19		7.19	8.22		10.8	12.4
	108	97.4		19.2	21.5		8.77	8.88		15.5	15.1
	101	98.1		18.6	20.3		8.29	9.9		18.9	15.7
	99.6	108		20.9	20.3		8.9	8.88		12.9	10.1
	107	96.6		19.9	20.1		7.7	7.64		14.2	12.4
	116	96.1		17.9	20.5		7.49	8.88		11.9	11.2
	124	108		16.8	22.5		6.79	6.77		11.9	11.6
	113	108		18.3	20.7		7.64	10.4		15.1	13.2
	127	106		16	23		8.53	10.4		16.3	15.5
	119	90.5		19.7	22.5		8.9	7.33		13.1	13.9
	125	99.4		20	23.3		6.74	9.06		14	13.1
	112	95		18.5	20.5		7.49	9.57		15	12.8
	125	99		20.7	20.3		7.19	10.1		12.8	12.9
	120	101		20.3	25.6		8.44	11.9		12.4	15.3
	125	95		18.1	20.3		8.44	10.4		15.9	16
	115	110		18.6	18		8.32	8.8		17.8	13.9
	125	94.7		23.2	15.5		7.94	6.28		18.9	9.57
	122	92.6		15.3	18		7.1	7.95		13.9	8.88
	113	89		16.9	18.5		6.79	7.94		15.1	12.9
	119	92		19.2	18.8		8.88	7.71		15.9	14.7
	114	97.6		20.1	18.1		8.92	7.33		14.3	13.1
	94.4	107		17.6	18.7		7.94	7.33		12.4	18
	101	85.4		18.3	19.2		6.94	6.28		18.8	14.3
	105	97.8		16.9	20.2		6.3	5.77		14.7	15.5
	104	108		18.1	19.8		6.4	7.77		13.9	17.1
	95.1	110		18.8	19.4		9.3	7.97		10.7	12.6
	103	81.7		17.6	16.5		9.3	7.93		10.1	11.6
	93.8	105		21.6	16.4		8.3	7.65		12.6	14
	102	101		20.4	15.5		10	8.74		14.7	13.1
	107	94.2		20.9	19.5		9.06	9.15		17.5	12.6
	130	96.5		20.4	17.1		10.05	8.81		13.9	9.57
	97.7	95.8		19.5	15		8.44	6.9			13.1
	100	96.8		20.7	15.7		8.18	7.9			13.4
	106	109		18.1	16.9		9	8.06			13.5
	104	110		21.2	17.1		8.88	7.33			13.8
	102	103		14.6	17.8		8.06	8.88			10.1
	95.1	109		17.1	17.5		10.08	8.81			11.3
	93.7	99.3		18.5	16.4		8.09	7.54			11.6
	99.7	99.8		20.3	16.5		10.7	8.6			11.4
	89.8	97.2		21.2	16.4		7.82	8.2			11.6
	96.9	95.8		20.1	22.7		10.02	8.21			12.2
	98.7	91.5		17.4	20.8		8.88	6.03			10.7
	98.8	96.5		19.3	19.8		10.2	8.41			7.88
	96.4	102		17.1	20.9		9.2	7.72			7.95
	94.9	103		17.1	20.8		8.1	5.63			10.7
	90.4	99.3		17	20.8		8.88	8.94			7.88
	92.9	114		20.1	22.5		8.69	7.26			7.95
	94.4	102		19.7	15.6		7.56	6.91			10.7
	98	100		23.5	20.9		10.5	8.64			9.81
	96.4	105		20.7	24.5		8.6	8.55			12.8
	96.5	97.4		25.2	28.1		10.7	8.81			13.4
	98.7	94.2		26.2	15.9		10.4	6.58			10.3
	91.4	97.6		21.4	23.5		10.1	10.9			13.2
	99.7	107		23.5	22.7		7.54	7.82			19
	90.1	96.7		21.5	23.2		10.2	9.85			14.7
	84.4	92.3		20.1	23.2		10.1	10.2			15.9
	93.4	90.3		27.1	26.2		9.57	6.91			13.7
	92.7	105		22.3	21.8		9.15	8.64			17
	94.5	94.9		27.9	15.9		9.15	7.43			14.2
	99.8	105		20.3			9.54				13.9
	98.8	104		17.8			8.43				17.5
	87.3	98		22.6			8.88				15.1
	93.3	129		22.3			9.42				18.5
	95	128		20.1			8.54				15.1
	88.7	87.8		23			8.95				13.9
	94.1	94.6		22.8			10.6				17
	106	90.5		22.3			7.54				6.23
	104	92.3		27.1			7.94				13.7
	99.4	93.6		22.6			10.1				15.5
	87.1	96.3					8.36				15.9
	103	91.2					9.15				17.8
	107	91.9					8.88				13.2
	97.5	97.5									13
	98.5	92.9									21.6
	98.9	94.8									14.7
	97.9	92.3									21.6
	90.8	94									15.6
	99.5	95.8									17
	101	92.9									14.7
	99.2	94.2									14.6
	97.4	102									16.6
	105	98.7									15.9
	105	102									15.9
	96.8	97.7									21.1
	95.8	105									19.6
	104	102									22.1
	103	106									15.5
	105	92.5									15.6
	96.4	94									16.1
	98.1	100									17
	107	99.3									14.9
	96.2	105									11.3
	98.2	107									18.2
	92.1	104									15.9
	98	115									12.2
	93.2	109									11.5
	106	87.2									10.1
	86.9	104									12.6
	93.3	103									17.5
	96.3	91.6									21.8
	90.3	106									12.8
	108	101									15.9
	130	105									13.8
	141	94.3									18.1
	139	93.1									16.7
	137	86.7									16.4
	144	85.4									15.3
	121	85.6
	114	105
	106	110
	111	110
	108	114
	107	106
	132	81.9
	112	117
	124	103
	118	104
	104	124
	106	82.7
	92.9	113
	95.9	108
	103	97.5
	97.5	98
	108	101
	107	114
	115	108
	113	118
	116	105
	89.4	107
	105
	115
	107
	88.6
	101
	109
	114
	110
	105
	109
	110
	111
	112
	111
	106
	101
	108
	104
	108
	108
	108
	110
	99.3
	121
	126
	117
	111
	111
	113
	116
	121
	114
	113
	109
	111
	105
	105
	111
	108
	92.1
	107
	108
	112
	107
	107
	108
	118
	111
	99.1
	110
	110
	122
	101
	109
	99.1
	92.7
	93.9
	95.4
	129
	111
	108
	115
	117
	119
	117
	102
	116
	103
	118
	116
	118
	125
	112
	121
	96.7
	103
	113
	107
	107
	120
	112
	121
	117
	109
	102
	104
	111
	93.4
	98.4
	89.7
	107
	121
	102
	97.3
	102

## Sheet: Supplementary Fig. 5
	Supplementary Fig.5a
	PBS	2.5 μM α-SynPD-NEV fibrils	2.5 μM α-SynMSA-OEV fibrils	5 μM α-SynPD-NEV fibrils	5 μM α-SynMSA-OEV fibrils
	98.9924	96.5995	73.8035	88.2872	40.1763
	104.66	80.1008	83.6272	82.7456	66.8766
	96.3476	94.3325	80.8564	92.0655	65.7431
		108.816	79.3451	90.932	43.073
	Supplementary Fig.5b
	PBS	2.5 μM α-SynPD-NEV fibrils	2.5 μM α-SynMSA-OEV fibrils	5 μM α-SynPD-NEV fibrils	5 μM α-SynMSA-OEV fibrils
	97.457	100.374	86.911	99.1025	71.5782
	101.945	85.5647	86.6118	97.2326	83.3957
	100.598	96.1855	90.8751	93.5677	84.368
		96.5595	89.9028	88.8557	74.7943

## Sheet: Supplementary Fig. 6
									Supplementary Fig. 6a
									1 m.p.i.			3 m.p.i.			5 m.p.i.
									Neuα-syn+NEV	Oligα-syn+OEV	Ctrl	Neuα-syn+NEV	Oligα-syn+OEV	Ctrl	Neuα-syn+NEV	Oligα-syn+OEV	Ctrl
									3715.98	5035.04	5821.64	1238.2	2999.43	4784.84	1284.84	2814.57	5304.32
									2762.35	4883.94	4999.74	1170.74	3076.8	3505.33	2659.83	2992.95	5164.54
									2747.42	3789.97	4569.49	1924.25	3953.21	4147.76	1326.8	3346.55	5499.12
									1708.51	4470.21	4376.56	2579.84	2738.44	5495.85	1100.38	3487.31	4144.26
									3379.01	3928.33	4723.08	3051.23	3285.84	3454.1	2181.64	3010.77	4431.67
									3585.01	4243.6		2051.68	5013.2		2023.27	3702.15
									5862.2	4028.3		5179.93	4543.16		1495.65	4316.79
									Supplementary Fig. 6b
									1 m.p.i.			3 m.p.i.			5 m.p.i.
									Neuα-syn+NEV	Oligα-syn+OEV	Ctrl	Neuα-syn+NEV	Oligα-syn+OEV	Ctrl	Neuα-syn+NEV	Oligα-syn+OEV	Ctrl
									4.12905	5.59474	6.46878	1.37584	3.33285	5.31673	1.42767	3.12744	5.89395
									3.06941	5.42685	5.55552	1.30088	3.41882	3.89498	2.9555	3.32565	5.73863
									3.05283	4.21126	5.07744	2.13815	4.39265	4.60883	1.47428	3.71856	6.1104
									1.89877	4.96713	4.86306	2.86662	3.04284	6.10677	1.39127	3.87496	4.60494
									3.75579	4.365	5.2481	3.39644	3.65158	3.83806	2.4459	3.34545	4.9243
									3.98352	4.71532		2.27975	5.57047		2.24817	4.11369
									6.51385	4.47609		5.75574	5.04818		1.6619	4.79665
									Supplementary Fig. 6c
									1 m.p.i.			3 m.p.i.			5 m.p.i.
									Neuα-syn+NEV	Oligα-syn+OEV	Ctrl	Neuα-syn+NEV	Oligα-syn+OEV	Ctrl	Neuα-syn+NEV	Oligα-syn+OEV	Ctrl
									543.52	529	585.68	144.72	323.32	547.48	181.24	313.72	577.64
									384.4	556.12	495.28	141.32	350.44	420.28	357.16	343.4	560.6
									413.24	388.64	475.12	317.12	443.56	448.32	162	397.96	596.04
									249.76	469.16	472.4	336.96	358.44	574.12	157.72	396.72	458.16
									382.96	471.72	500.56	292	385.16	428.96	299.52	315.68	511.64
									347.88	416.2		281.12	522.16		234.88	394.6
									688.4	439.76		603.28	463.56		188.92	474.12
									Supplementary Fig. 6d
									1 m.p.i.			3 m.p.i.			5 m.p.i.
									Neuα-syn+NEV	Oligα-syn+OEV	Ctrl	Neuα-syn+NEV	Oligα-syn+OEV	Ctrl	Neuα-syn+NEV	Oligα-syn+OEV	Ctrl
									102.72	159.92	166.44	96.92	93.92	132.4	0	46.6	140.28
									70.52	89.84	47.48	85.52	224.36	99.16	77.72	49.2	126.92
									91.24	34.48	44.8	153.6	62	52.24	12.56	67.24	116.88
									66.52	95.12	74.84	33.52	49.6	46.68	6.72	93.8	148.16
									70.4	74.76	165.12	76.24	30.28	176.72	111.52	34.72	168.84
									268.56	36.52		4.36	50.52		8.8	39.68
									126.2	76.44		210.88	52.68		32.24	92.68
									Supplementary Fig. 6e
									1 m.p.i.			3 m.p.i.			5 m.p.i.
									Neuα-syn+NEV	Oligα-syn+OEV	Ctrl	Neuα-syn+NEV	Oligα-syn+OEV	Ctrl	Neuα-syn+NEV	Oligα-syn+OEV	Ctrl
									4.2	2.6	2.2	3.6	3.4	2.2	3.8	3.6	2.6
									3.6	2.4	2.2	3.2	3.2	2.4	3.6	3.4	2.6
									3.8	2.4	2.4	3.8	3.2	2.4	3.8	3.4	2.2
									3.8	2.2	2.2	3.6	3.4	2.2	3.6	3	2.6
									2	2.6	2.6	3.6	3.2	2	3.4	3.4	2.4
									2.8	2.4		2.8	2.6		2.8	3
									2.6	2.6		2.6	3		3.4	3.2

## Sheet: Supplementary Fig. 7
	Supplementary Fig. 7a
	1 m.p.i.			3 m.p.i.			5 m.p.i.
	Neuα-syn+NEV	Oligα-syn+OEV	Ctrl	Neuα-syn+NEV	Oligα-syn+OEV	Ctrl	Neuα-syn+NEV	Oligα-syn+OEV	Ctrl
	88	81	97	92	90	110	84	83	102
	69	86	105	89	83	97	99	96	101
	95	51	108	78	86	103	87	82	106
	99	97	89	82	85	106	85	72	111
	83	92	92	95	70	95	82	79	115
	70	99		98	86		96	98
	93	94		86	93		87	83
	Supplementary Fig. 7b
	1 m.p.i.			3 m.p.i.			5 m.p.i.
	Neuα-syn+NEV	Oligα-syn+OEV	Ctrl	Neuα-syn+NEV	Oligα-syn+OEV	Ctrl	Neuα-syn+NEV	Oligα-syn+OEV	Ctrl
	4.11	4.34	4.28	3.87	4.25	4.57	3.95	4.46	4.23
	4.17	4.54	4.47	4.23	4.43	4.81	3.99	4.52	4.11
	4.31	3.83	4.65	4.65	4.86	4.97	4.36	4.31	4.57
	4.88	4.78	4.83	4.52	4.69	4.32	4.12	4.24	4.82
	4.65	4.88	4.79	4.27	4.65	4.51	4.54	4.03	4.04
	4.12	4.65		4.13	4.82		4.12	4.63
	4.39	4.28		4.71	4.59		4.33	4.35
	Supplementary Fig. 7c
	1 m.p.i.			3 m.p.i.			5 m.p.i.
	Neuα-syn+NEV	Oligα-syn+OEV	Ctrl	Neuα-syn+NEV	Oligα-syn+OEV	Ctrl	Neuα-syn+NEV	Oligα-syn+OEV	Ctrl
	5.8	6.3	6.4	5.9	6.3	7.1	5.3	6.4	6.4
	6.1	6.4	6.8	5.8	6.7	6.6	6.8	5.7	6.3
	6.2	6.3	6.3	6.4	6.2	6.2	5.8	6.1	6.7
	6.4	6.5	6.1	6.3	5.9	6.8	6.3	5.6	6.1
	6.6	5.9	6.2	6.8	6.6	6.5	6.2	6.2	6.2
	6.7	5.9		6.8	6.2		5.9	6.6
	6.3	6.7		6.9	6.3		6.4	6.4
	Supplementary Fig. 7d
	1 m.p.i.			3 m.p.i.			5 m.p.i.
	Neuα-syn+NEV	Oligα-syn+OEV	Ctrl	Neuα-syn+NEV	Oligα-syn+OEV	Ctrl	Neuα-syn+NEV	Oligα-syn+OEV	Ctrl
	104.846	120.611	156.35	118.5	126.6	121.083	104.846	114.659	121.083
	128.412	105.667	130	113.9	103.375	139.357	124.278	111.85	126
	123.889	123.8	119.357	124.316	109.5	128	109	96.5455	136.667
	102.625	120	123	106	113.231	146.333	111.158	113.231	119
	114.659	108.25	118.5	112.679	133.727	114.222	101.636	107.5	134.333
	108.6	122.2		104.529	139.387		114.167	120.611
	110.059	115.222		123.273	132		113	108.909
	Supplementary Fig. 7e
	1 m.p.i.			3 m.p.i.			5 m.p.i.
	Neuα-syn+NEV	Oligα-syn+OEV	Ctrl	Neuα-syn+NEV	Oligα-syn+OEV	Ctrl	Neuα-syn+NEV	Oligα-syn+OEV	Ctrl
	75.6154	65	96.5714	70.2857	87.25	85.5833	75.6154	78.6111	79.3333
	77.6	91.5	80	64	85.5	77.5	73.3	79.2222	81.3333
	74	85.5	66	79	101	98	77	76.4545	81.6667
	82	79.3333	81	64.8571	86.7143	86.1667	73.6	86.7143	87.5
	78.6111	89.2	95.5	82.3571	89.1429	105	68.6364	77.5	82
	80	82.5714		77.5	96.4286		75.6667	65
	71.6667	86		75	92.5		72	66
	Supplementary Fig. 7f
	1 m.p.i.			3 m.p.i.			5 m.p.i.
	Neuα-syn+NEV	Oligα-syn+OEV	Ctrl	Neuα-syn+NEV	Oligα-syn+OEV	Ctrl	Neuα-syn+NEV	Oligα-syn+OEV	Ctrl
	314.874	660.701	609.276	363.789	468.025	471.8	314.874	372.432	441.442
	559.147	444.117	469.903	310.96	372.021	550.864	460.055	439.386	560.876
	436.604	425.189	610.16	612.339	415.448	384.577	350.02	398.981	418.857
	330.171	411.825	596.837	333.46	614.18	494.373	417.374	614.18	411.724
	372.432	359.131	526.998	473.669	423.361	586.981	446.189	343.583	465.906
	375.17	349.761		533.671	539.811		586.479	660.701
	428.692	373.691		640.444	505.567		481.887	621.253
	Supplementary Fig. 7g
	1 m.p.i.			3 m.p.i.			5 m.p.i.
	Neuα-syn+NEV	Oligα-syn+OEV	Ctrl	Neuα-syn+NEV	Oligα-syn+OEV	Ctrl	Neuα-syn+NEV	Oligα-syn+OEV	Ctrl
	93.3333	99.1333	148.6	100.917	90	122.12	93.3333	99.7333	116.111
	117	108.667	118.333	102.875	99	116.3	95.4706	104.929	111.167
	117.25	108.6	114.077	123.571	99.1111	126	98.7778	91.6667	127.25
	100.875	112.1	142	98.9	137.75	129.286	93.5294	97.4118	121.067
	111.85	109.8	120.75	111.462	122	138.375	91	77.25	124.083
	104	119.625		100.6	127.5		101.368	121.643
	93.6364	106.556		117.25	129.111		96	100.917
	Supplementary Fig. 7h
	1 m.p.i.			3 m.p.i.			5 m.p.i.
	Neuα-syn+NEV	Oligα-syn+OEV	Ctrl	Neuα-syn+NEV	Oligα-syn+OEV	Ctrl	Neuα-syn+NEV	Oligα-syn+OEV	Ctrl
	63	52.6667	95.6667	73.25	96	87.25	63	63	76.2222
	72.5	85	76.5	77.5	83	92	66.25	50	80.6667
	63.5	77	69.5	81.3333	96	103	61.5	58.3333	77
	83.5	69	70	80	77.5	95.5	52.6667	73.5	83
	79.2222	66.6667	99	76.625	75	106.5	60.5	48.75	90.0833
	71	93		73	96		86.5	50
	82	76		75	93.5556		64	57
	Supplementary Fig. 7i
	1 m.p.i.			3 m.p.i.			5 m.p.i.
	Neuα-syn+NEV	Oligα-syn+OEV	Ctrl	Neuα-syn+NEV	Oligα-syn+OEV	Ctrl	Neuα-syn+NEV	Oligα-syn+OEV	Ctrl
	456.045	650.285	584.038	403.27	478	463.663	456.045	358.236	400.183
	624.221	404.633	469.42	660.838	347.314	557.962	435.952	493.22	533.026
	356.958	423.425	630.629	549.085	335.777	541.933	347.225	412.509	465.965
	489.483	385.719	642.892	442.428	673.989	361.674	363.275	619.773	393.472
	439.386	310.976	647.477	442.513	704.8	616.885	382.177	296.465	395.916
	332.986	453.636		540.17	450.922		541.929	682.386
	497.085	342.306		513.945	335.235		420.32	618.59
