# Supplementary material for: Extracellular vesicle α-synuclein seeds drive divergent phenoconversion from iRBD to Parkinsonism
Source: Research Square preprint supplement (doi:10.21203/rs.3.rs-8466772/v1), 2026-01-09
Supplement: Supplementary file 5 [file Uncropped blots.docx]

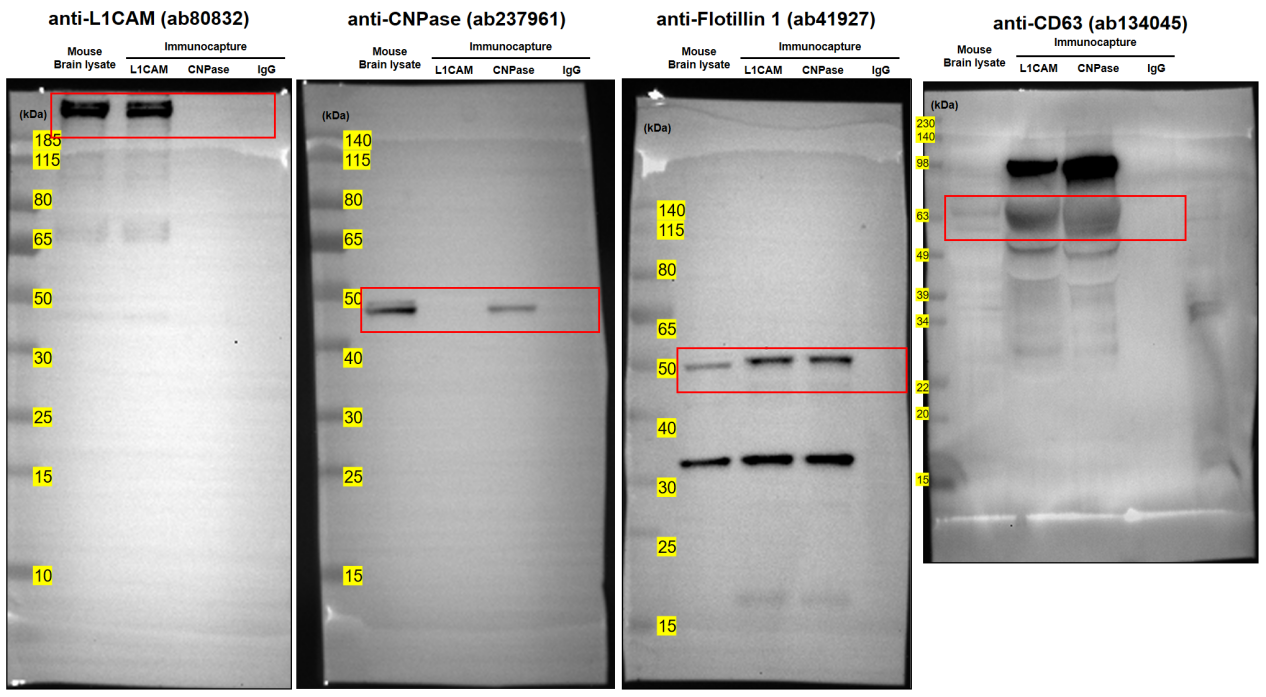


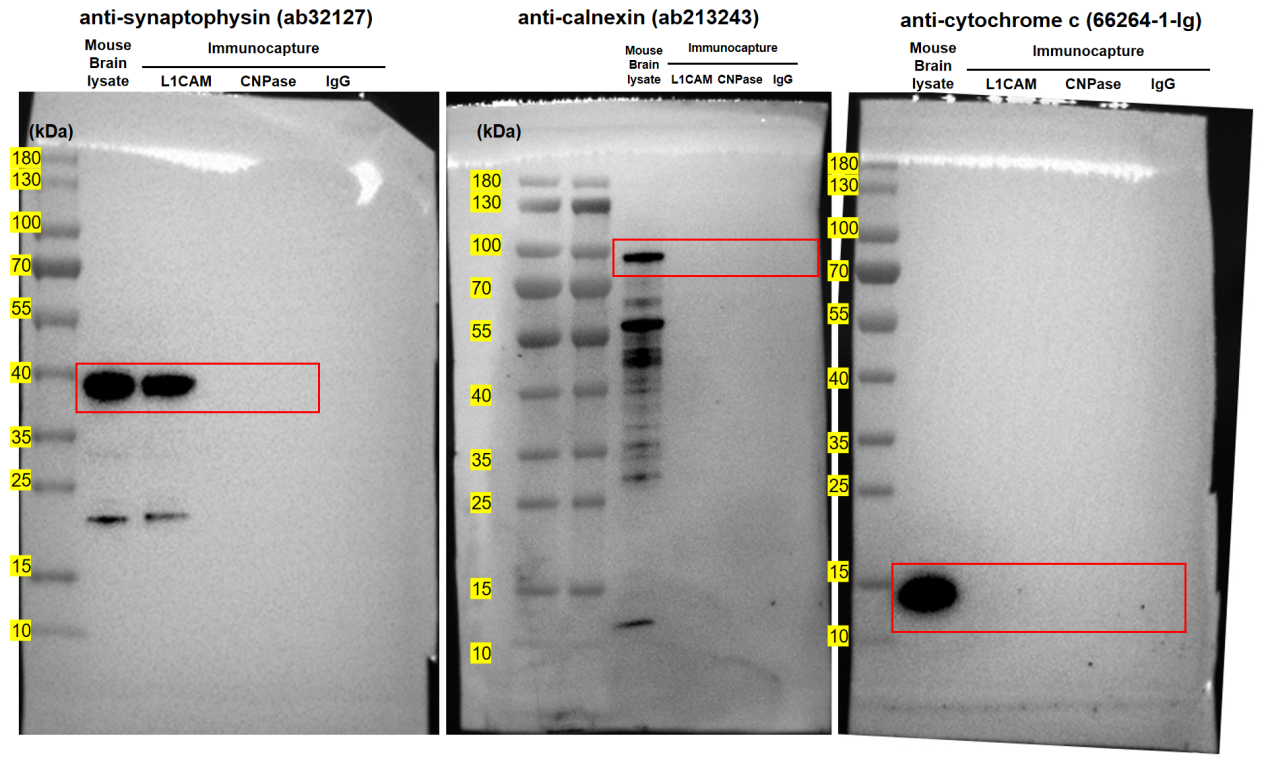


The molecular weight of prestained protein ladder were given in yellow boxes. Lanes from left to right: prestained protein ladder, mouse brain lysate (positive control), neuronal exosomes immunocaptured by L1CAM antibody, oligodendroglial exosomes immunocaptured by CNPase antibody, negative control (normal mouse IgG). The red squares indicate the cropped blot images in **Fig. 2c**.
